# Supplementary material for: Exercise Training Enhances Platelet Mitochondrial Bioenergetics in Stroke Patients: A Randomized Controlled Trial
Source: PubMed Central journal article supplement (PMC6947198; doi:10.3390/jcm8122186), 2019-12-11
Supplement: jcm-08-02186-s001.pdf [file jcm-08-02186-s001.pdf]

## Supplementary Materials:

**Figure S1:** Flowchart of enrolled stroke patients during following-up. Inclusion and exclusion criteria listed in the figure were used to recruit eligible candidates. Recruited stroke patients were divided into two groups based on their treatments: TRP with (**TRP+ET**) and without ET (**TRP**). In addition to TRP, the TRP+ET group performed supervised in-hospital training on a bicycle ergometer (i.e., 50~60% $VO_{2peak}$  for 30 min/day, 5 days/week for 4 weeks). The **TRP** group only engaged in traditional rehabilitation course for 4 weeks, as instructed by their rehabilitation physicians.

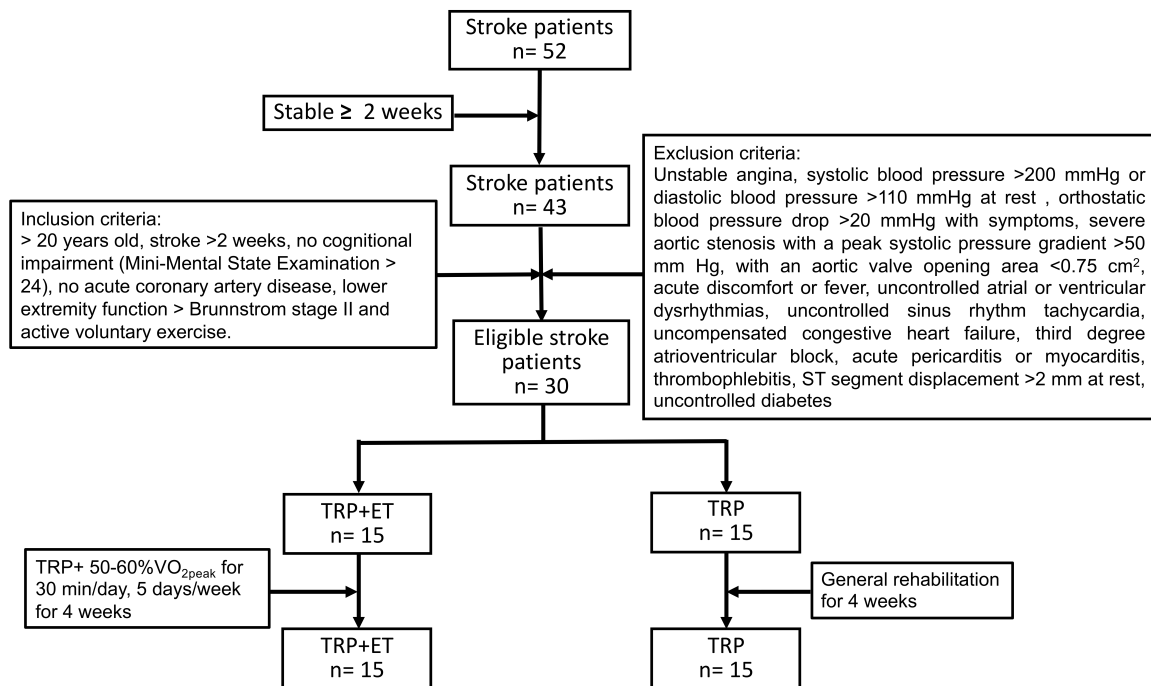

**Figure S2:** Graphs showing the reference protocols [(A) RP1 and (B) RP2] of substrate-uncoupler-inhibitor titration (SUIT) and (C) convergent electron transfers at levels of the Q-junction [Complexes I and II (CI and CII), glycerophosphate dehydrogenase (GpDH), and electron-transferring flavoprotein (ETF)] in platelets. RP1 and RP2 are the SUIT experiments to measure mainly the capacities of mitochondrial oxidative phosphorylation (OXPHOS) and electron transport chain (ETC) in platelets, respectively. LEAK, uncoupling proton leakage; ADP, adenosine diphosphate; P, pyruvate; M, malate; G, glutamate; S, succinate; Oct, octanoyl-carnitine; Gp, glycerophosphate; FCCCP, carbonyl cyanide-p-trifluoromethoxyphenylhydrazone; Rot, rotenone; Ama, antimycin A.

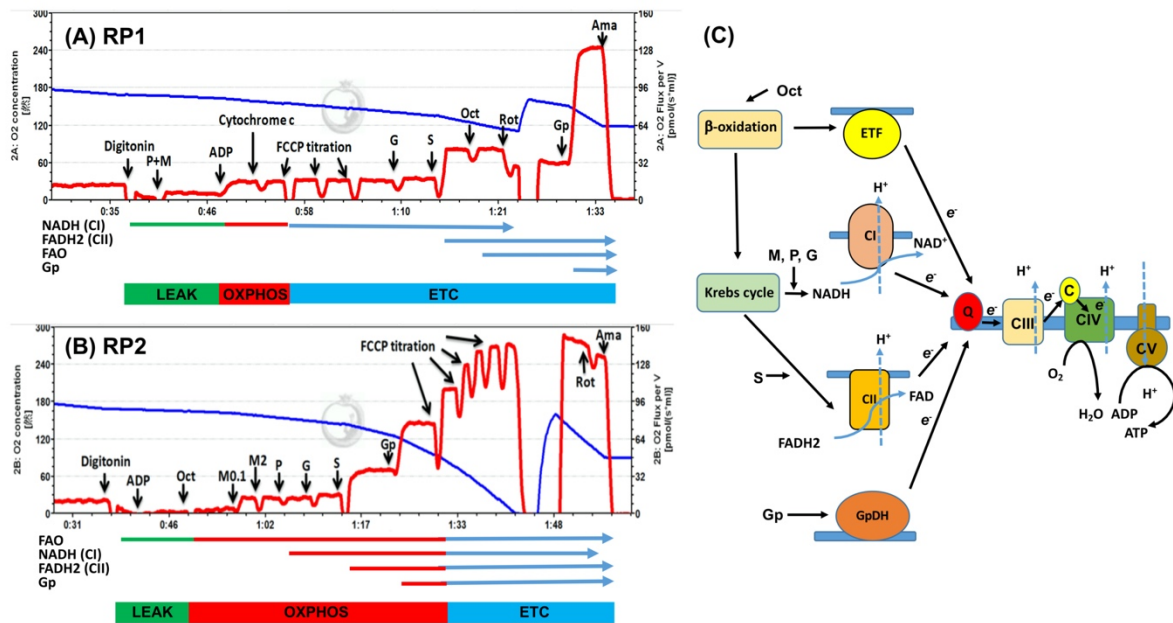

**Table S1:** Baseline demographics in hemorrhagic stroke patients.

|                                                 |                   | TRP+ET   | TRP      |
|-------------------------------------------------|-------------------|----------|----------|
| <b>Anthropometrics/Clinical Characteristics</b> |                   |          |          |
| Gender                                          | n (M/F)           | 3 (3/0)  | 3 (3/0)  |
| Age                                             | year              | 55.3±5.4 | 59.0±5.7 |
| BMI                                             | kg/m <sup>2</sup> | 23.7±1.6 | 28.3±1.6 |
| Heart rate                                      | bpm               | 69±3     | 71±5     |
| Systolic blood pressure                         | mmHg              | 133±16   | 149±5    |
| Diastolic blood pressure                        | mmHg              | 87±16    | 99±7     |
| Stroke duration                                 | month             | 29.0±12  | 26.2±14  |
| <b>Brunnstrom stage</b>                         |                   |          |          |
| >Stage III                                      | n (%)             | 3 (100)  | 3 (100)  |
| Mini-Mental State Examination                   | score             | 28.3±1.7 | 29.0±0.8 |
| <b>Risk factors</b>                             |                   |          |          |
| Smoking                                         | n (%)             | 0 (0)    | 0 (0)    |
| Hyperlipidemia                                  | n (%)             | 1 (33)   | 1 (33)   |
| Hypertension                                    | n (%)             | 3 (100)  | 3 (100)  |
| CVD                                             | n (%)             | 1 (33)   | 1 (33)   |
| Diabetes mellitus                               | n (%)             | 1 (33)   | 1 (33)   |
| <b>Medicines</b>                                |                   |          |          |
| ASA                                             | n (%)             | 0 (0)    | 0 (0)    |
| HMG CoA reductase inhibitor                     | n (%)             | 1 (33)   | 1 (33)   |
| β-blockers                                      | n (%)             | 2 (67)   | 0 (0)    |
| ACEI/ARB                                        | n (%)             | 2 (67)   | 2 (67)   |

Values are mean ± SEM. ACEI/ARB, angiotensin converting enzyme inhibitor/angiotensin II receptor blocker; ASA, acetylsalicylic acid; BMI, body mass index; CVD, cardiovascular diseases; ET, exercise training; HMG CoA, 3-hydroxy-3-methyl- glutaryl coenzyme A; TRP, traditional rehabilitation program.

**Table S2:** Estimated power in measured parameters

| <b>Parameter</b>          | <b>F-value</b> | <b><i>p</i>-value</b> | <b><math>\lambda</math></b> | <b>Power</b> |
|---------------------------|----------------|-----------------------|-----------------------------|--------------|
| VO <sub>2peak</sub>       | 53.434         | < 0.0001              | 53.434                      | 1.000        |
| Max. ETC                  | 52.242         | <0.0001               | 52.242                      | 1.000        |
| ETC <sub>CI+CII</sub>     | 21.160         | < 0.0001              | 21.160                      | 0.997        |
| ETC <sub>CI+CII+FAO</sub> | 13.028         | 0.0012                | 13.028                      | 0.952        |
| ETC <sub>CII</sub>        | 10.742         | 0.0028                | 10.742                      | 0.902        |
| ETC <sub>CII+Gp</sub>     | 16.109         | 0.0004                | 16.109                      | 0.983        |
| Max. OXPHOS               | 19.226         | 0.0001                | 19.228                      | 0.995        |

ETC<sub>CII</sub>, electron transport chain of complex I in mitochondria; ETC<sub>CI+CII</sub>, electron transport chain in complex I & II of mitochondria; ETC<sub>CII+Gp</sub>, electron transport chain in complex II & glycerophosphate of mitochondria; ETC<sub>CI+CII+FAO</sub>, electron transport chain of complex I, II, & fatty acid oxidation in mitochondria; Max. ETC, maximal electron transport chain capacity; Max. OXPHOS, maximal oxidative phosphorylation capacity; VO<sub>2peak</sub>, peak exercise capacity.
